# Supplementary material for: Impact of Exercise Intervention Combined with Optimal Mediterranean Diet Adherence during Pregnancy on Postpartum Body Composition: A Quasi-Experimental Study—The GESTAFIT Project
Source: MDPI journal article supplement (doi:10.3390/nu15204413), 2023-10-18
Supplement: s1 [file s1]

## **Supplementary Material**

Supplement to: **“Impact of Exercise Intervention Combined with Optimal Mediterranean Diet Adherence during Pregnancy on Postpartum Body Composition: A Quasi-Experimental Study—The GESTAFIT Project”**

### **Table of contents**

**File S1.** Lectures provided to pregnant women

**Supplementary Figure S1.** Flow diagram of the study participants.

**Supplementary Table S1.** Inclusion and exclusion criteria in the GESTAFIT project.

**Supplementary Table S2.** Influence of the exercise program on postpartum body composition.

**File S1.** Lectures provided to pregnant women

During the duration of the intervention, the research team gave 7 lectures to pregnant women from both groups (exercise and control group) about: 1) the benefits of physical exercise for a better pregnancy, prevention and treatment of cardiovascular diseases and excessive weight gain; 2) ergonomic advises, exercises to perform at home and strategies to increase their daily physical activity levels; 3) the benefits of the Mediterranean Diet and nutritional education during pregnancy; 4) how to avoid toxics and chemicals during the pregnancy and breastfeeding; 5) pregnancy, postpartum and sex; 6) physical and mental preparation for the labour, what to expect; 7) nutritional education towards breastfeeding. We also used these conferences to maintain control group fidelity until the end of the program.

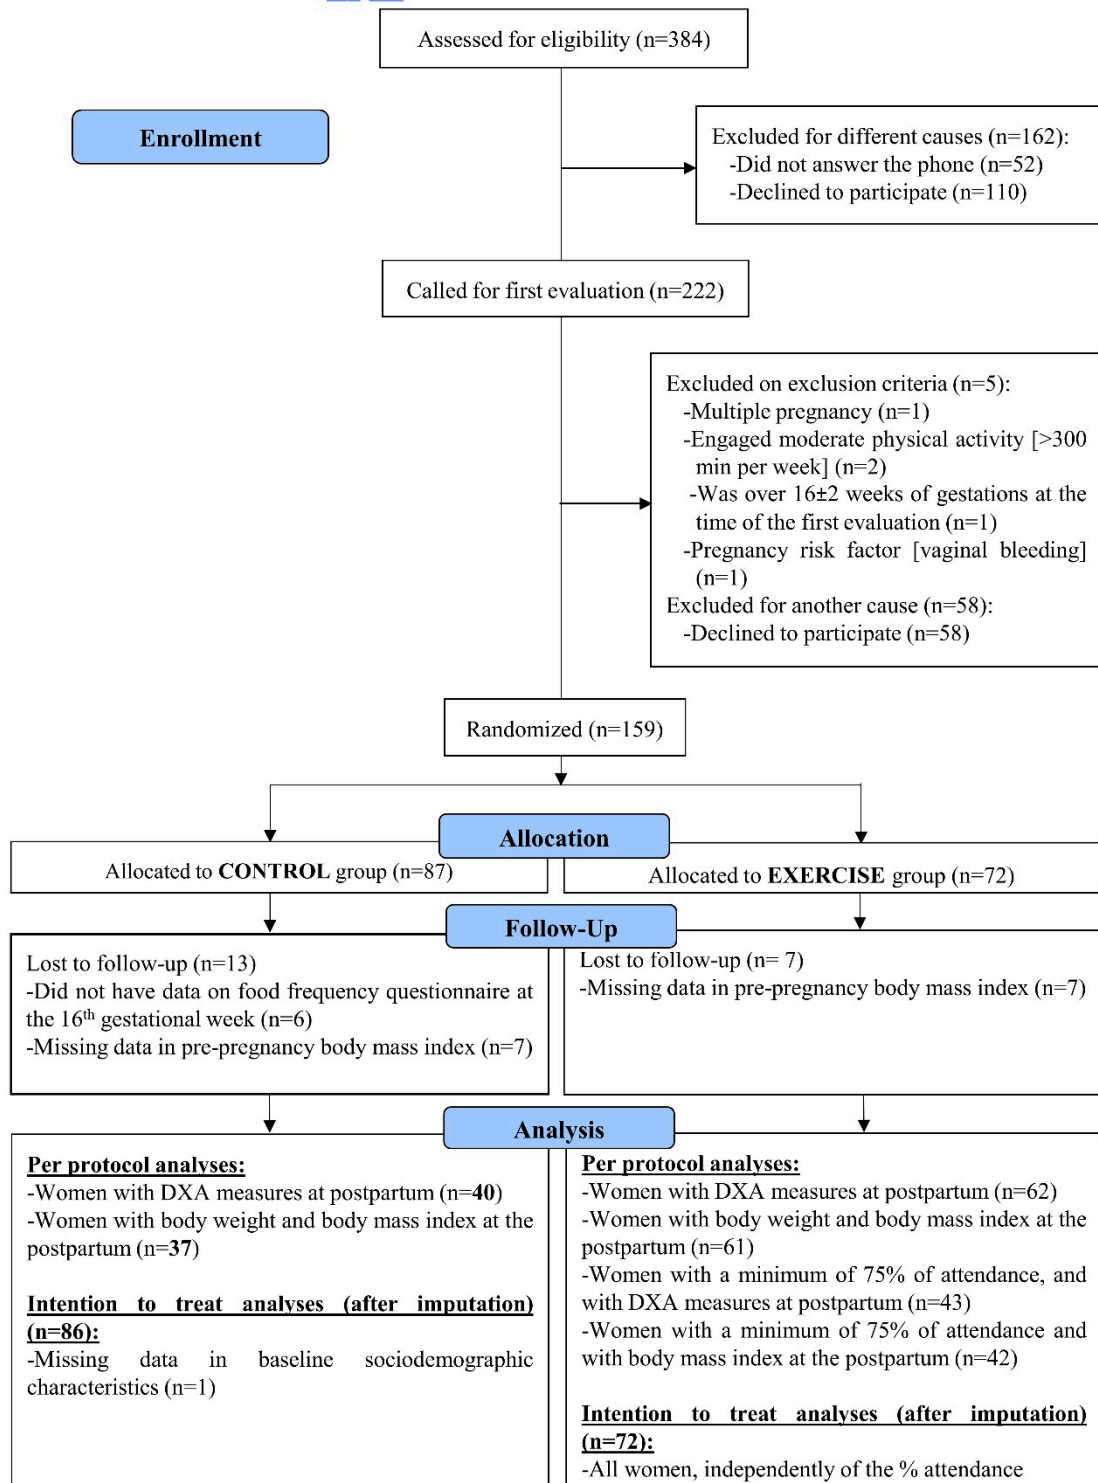

**Supplementary Figure S1.** Flow diagram of study participants.

**Supplementary Table S1.** Inclusion and exclusion criteria in the GESTAFIT project.

|                                                                                                                                                                                                                                                                                                                                                                                                                                                                                                                                                                                                                                                                                                                                                                                                                                                                                                                                                                                                                                                           |
|-----------------------------------------------------------------------------------------------------------------------------------------------------------------------------------------------------------------------------------------------------------------------------------------------------------------------------------------------------------------------------------------------------------------------------------------------------------------------------------------------------------------------------------------------------------------------------------------------------------------------------------------------------------------------------------------------------------------------------------------------------------------------------------------------------------------------------------------------------------------------------------------------------------------------------------------------------------------------------------------------------------------------------------------------------------|
| <b>Inclusion criteria</b>                                                                                                                                                                                                                                                                                                                                                                                                                                                                                                                                                                                                                                                                                                                                                                                                                                                                                                                                                                                                                                 |
| <ul style="list-style-type: none"><li>- Pregnant women aged 25-40 years old with a normal pregnancy course.</li><li>- Answering “no” to all questions on the PARmed-X for pregnancy.</li><li>- Being able to walk without assistance.</li><li>- Being able to read and write properly.</li><li>- Informed consent: Being capable and willing to provide written consent.</li></ul>                                                                                                                                                                                                                                                                                                                                                                                                                                                                                                                                                                                                                                                                        |
| <b>Exclusion criteria</b>                                                                                                                                                                                                                                                                                                                                                                                                                                                                                                                                                                                                                                                                                                                                                                                                                                                                                                                                                                                                                                 |
| <ul style="list-style-type: none"><li>- Having acute or terminal illness.</li><li>- Having malnutrition.</li></ul> <p>Being unable to conduct tests for assessing physical fitness or exercise during pregnancy.</p> <ul style="list-style-type: none"><li>- Having pregnancy risk factors (such as hypertension, type 2 diabetes, etc.).</li><li>- Having a multiple pregnancy.</li><li>- Having chromosopathy or foetal malformations.</li><li>- Having uterine growth restriction.</li><li>- Having foetal death.</li><li>- Having upper or lower extremity fracture in the past 3 months.</li><li>- Suffering neuromuscular disease or presence of drugs affecting neuromuscular function.</li><li>- Being registered in another exercise program.</li><li>- Performing more than 300 minutes of at least moderate physical activity per week.</li><li>- Being engaged in another physical exercise program</li><li>- Being unwilling either to complete the study requirements or to be randomized into the control or intervention group.</li></ul> |

**Supplementary Table S2.** Influence of the exercise program on postpartum body composition.

|                                      | Control<br>(n = 86) | Exercise<br>(n = 72) | Between-Group Difference (B) (95% CI) | P     |
|--------------------------------------|---------------------|----------------------|---------------------------------------|-------|
| <i>Intention to treat*</i>           |                     |                      |                                       |       |
| Body weight (kg)                     | 68.7 (0.7)          | 67.8 (0.7)           | 0.845 (-1.078 to 2.768)               | 0.387 |
| Body mass index (kg/m <sup>2</sup> ) | 25.9 (0.2)          | 25.4 (0.3)           | 0.516 (-0.194 to 1.225)               | 0.153 |
| Total lean mass (g)                  | 38779.5 (365.8)     | 39071.6 (400.0)      | -292.078 (-1365.919 to 781.763)       | 0.592 |
| Total fat mass (g)                   | 24438.4 (1782.8)    | 25193.2 (1949.5)     | -754.845 (-5988.664 to 4478.974)      | 0.776 |
| Total fat mass (%)                   | 35.8 (2.0)          | 37.8 (2.2)           | -2.093 (-8.112 to 3.926)              | 0.493 |
| Total Android fat mass (g)           | 1693.3 (260.7)      | 1762.2 (285.1)       | -68.968 (-834.416 to 696.480)         | 0.859 |
| Total gynecoid fat mass (g)          | 5603.7 (196.4)      | 5220.6 (214.7)       | 383.149 (-193.279 to 959.577)         | 0.191 |
| Visceral fat (g)                     | 371.6 (12.5)        | 374.7 (13.6)         | -3.082 (-39.678 to 33.514)            | 0.868 |
| Gynecoid to total fat mass           | 0.216 (0.058)       | 0.185 (0.063)        | 0.031 (-0.139 to 0.201)               | 0.718 |
| Android to gynecoid fat mass         | 0.143 (0.090)       | 0.323 (1.0)          | -0.180 (-0.445 to 0.085)              | 0.182 |

Values shown as mean (standard error). SE, standard error. Model adjusted for age and pre-pregnancy body mass index (kg/m<sup>2</sup>). \* The average percentage of attendance was 75%
